# Supplementary material for: A study of the thermoelectric properties of benzo[1,2-b:4,5-b′]dithiophene–based donor–acceptor conjugated polymers
Source: Royal Society of Chemistry journal article supplement (doi:10.1039/c8py00812d), 2018-01-01
Supplement: c8py00812d1.pdf [file c8py00812d1.pdf]

## **Study of the Thermoelectric Properties of Benzo[1,2-b:4,5-b']dithiophene-based Donor-Acceptor Conjugated Polymers**

Luhai Wang<sup>1</sup>, Chengjun Pan<sup>1,2,\*</sup>, Zhongming Chen<sup>3</sup>, Xiaoyan Zhou<sup>1</sup>, Chunmei Gao<sup>1,\*</sup>,  
Lei Wang<sup>1,2,\*</sup>

1) Shenzhen Key Laboratory of Polymer Science and Technology, College of Materials Science and Engineering, Shenzhen University, Shenzhen 518060, China

2) Guangdong Research Center for Interfacial Engineering of Functional Materials, Shenzhen University, Shenzhen 518060, China

3) School of environment and civil engineering, Dongguan University of Technology, Dongguan 523808, China.

Email: pancj@szu.edu.cn; gaocm@szu.edu.cn; wl@szu.edu.cn

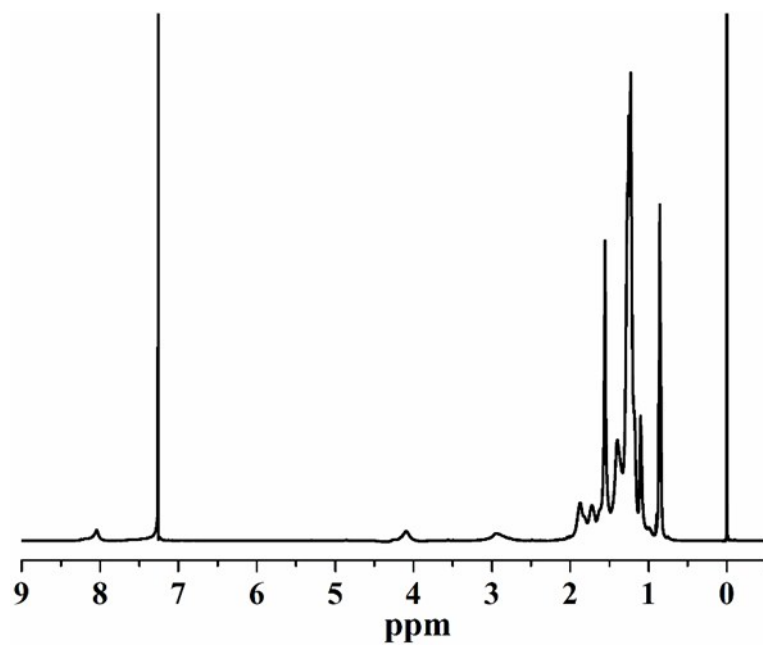

Figure S1.  $^1\text{H}$  NMR spectrum of PBDTDTBTF-1.

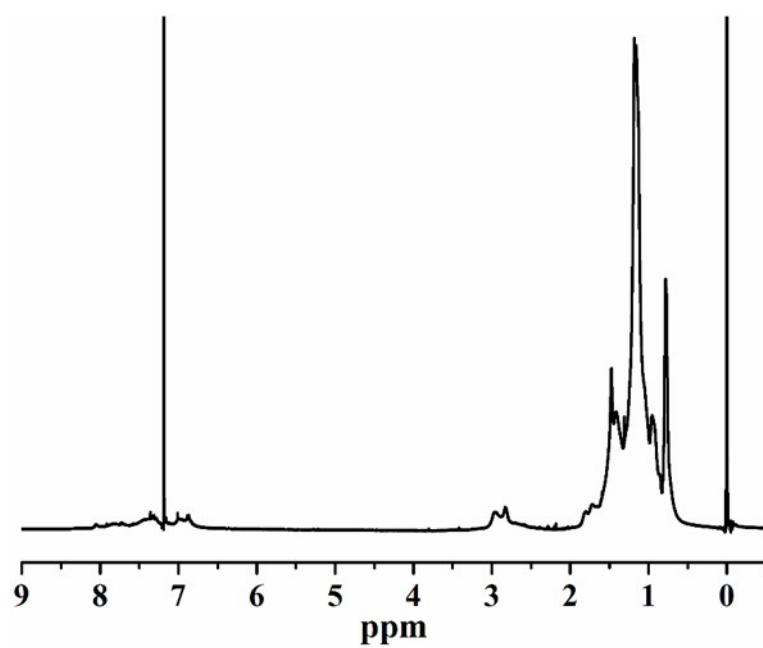

Figure S2.  $^1\text{H}$  NMR spectrum of PBDTDTBTF-2.

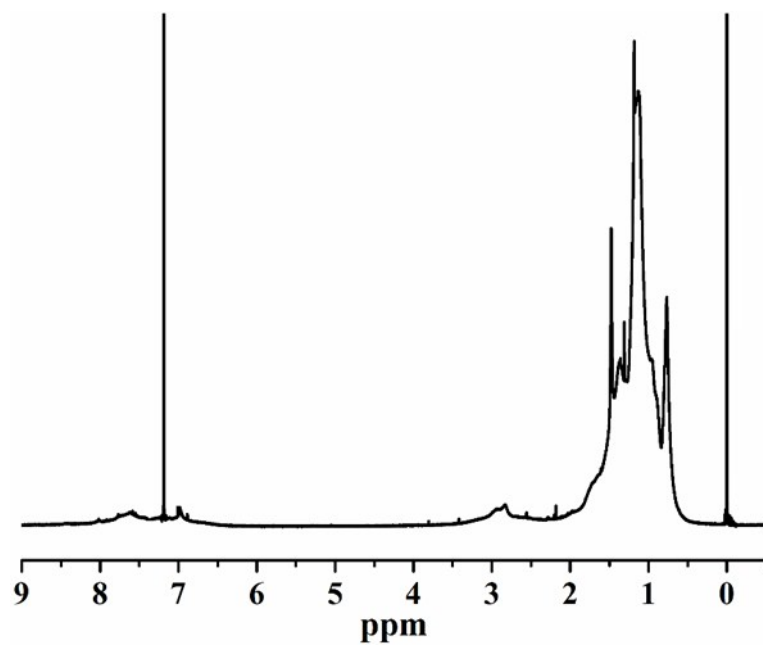

Figure S3. <sup>1</sup>H NMR spectrum of PBDTDTBTF-3.

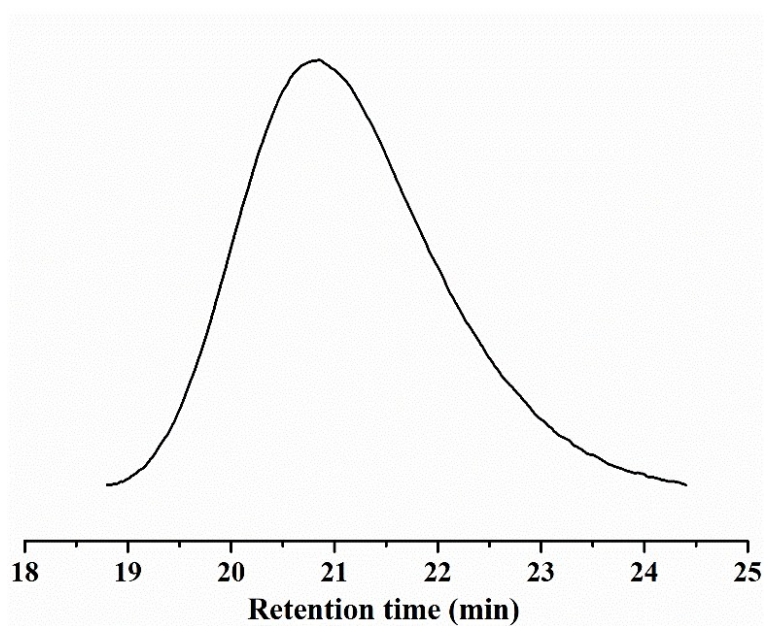

Figure S4. GPC curve of PBDTDTBTF-1.

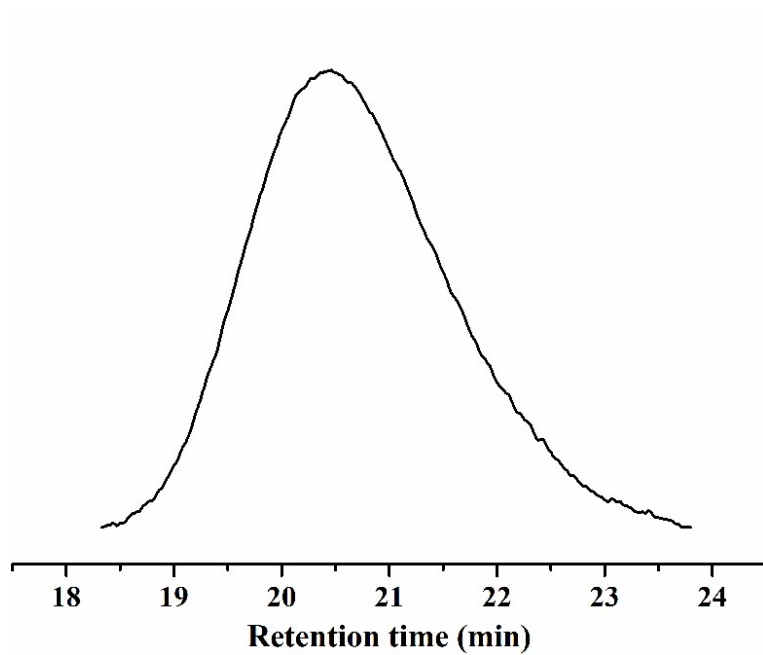

**Figure S5.** GPC curve of **PBDTDTBTF-2**.

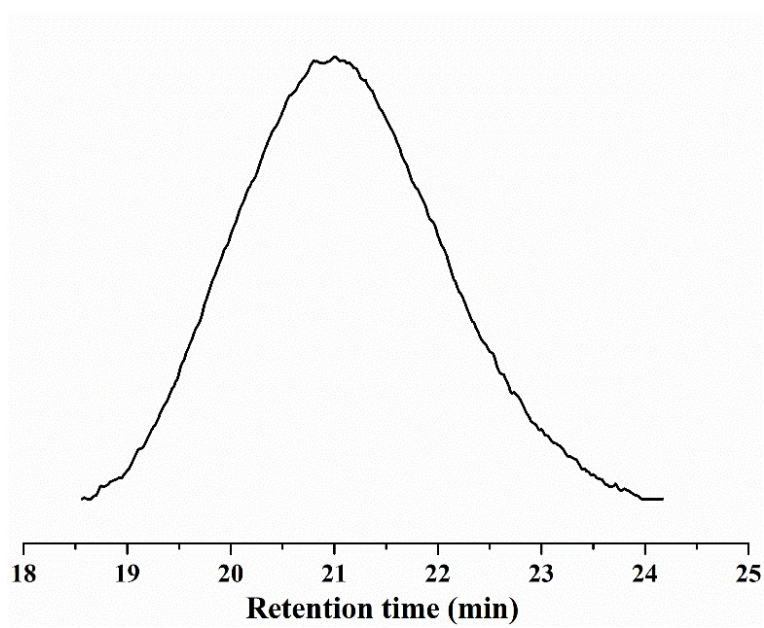

**Figure S6.** GPC curve of **PBDTDTBTF-3**.

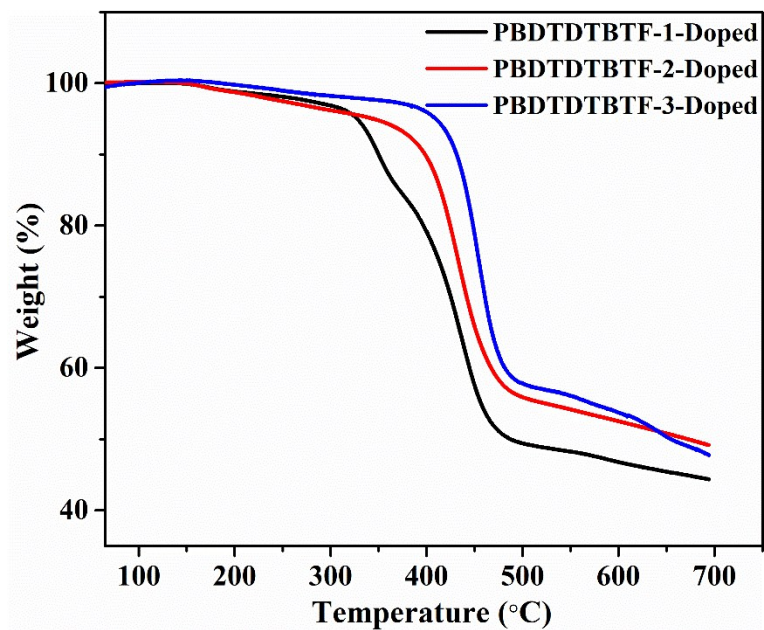

**Figure S7.** TGA curves of **PBDTDTBTF-1-Doped**, **PBDTDTBTF-2-Doped** and **PBDTDTBTF-3-Doped**.

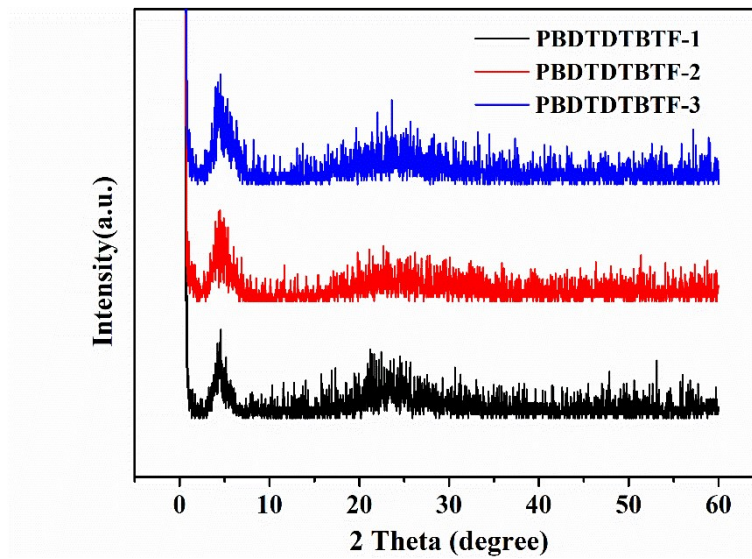

**Figure S8.** XRD curves of PBDTDTBTF-1, PBDTDTBTF-2 and PBDTDTBTF-3 films.

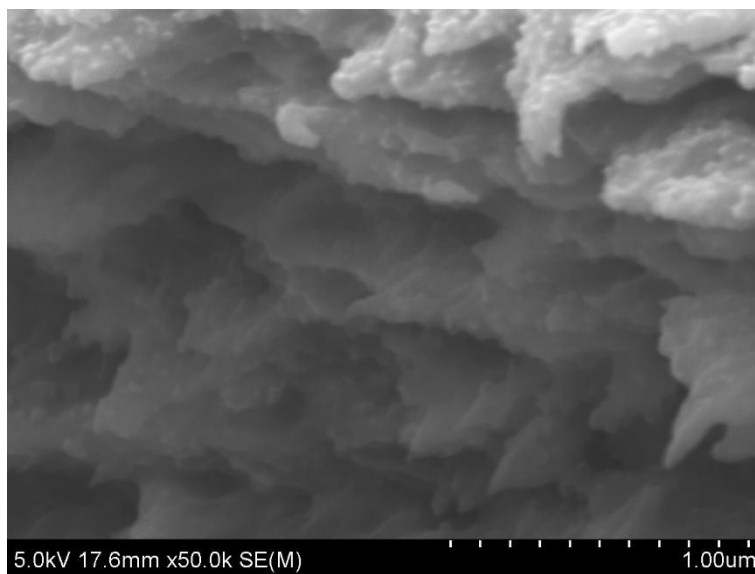

**Figure S9.** Cross-sectional SEM images of **PBDTDTBTF-1** film.

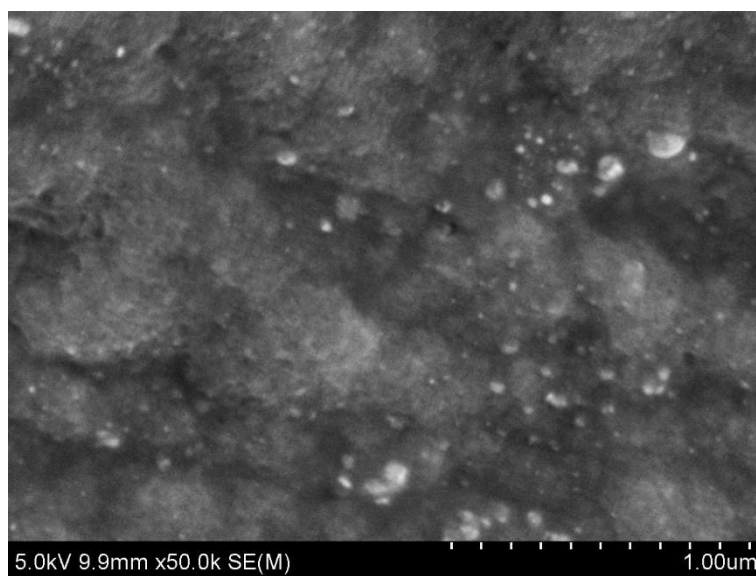

**Figure S10.** Cross-sectional SEM images of **PBDTDTBTF-2** film.



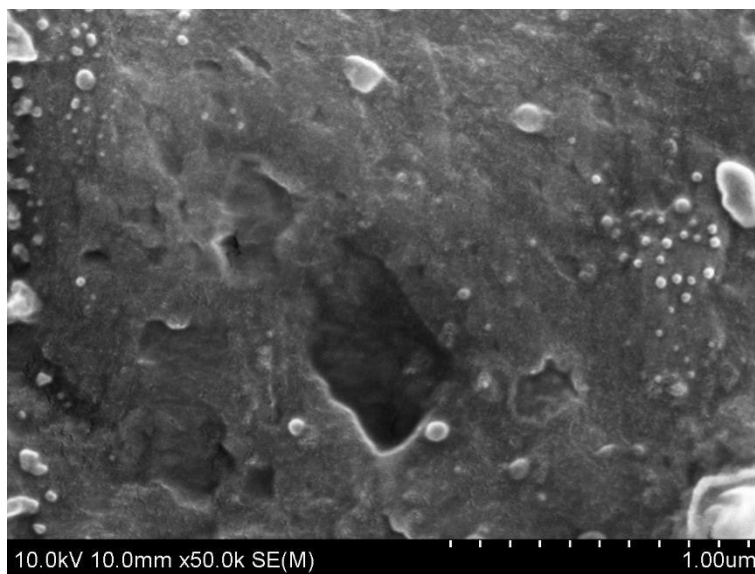

**Figure S11.** Cross-sectional SEM images of **PBDTDTBTF-3** film.

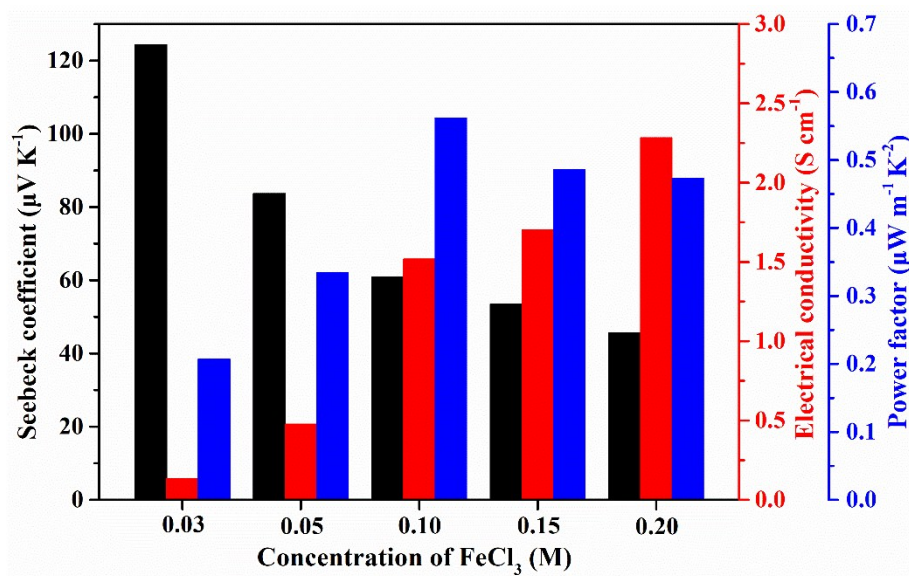

**Figure S12.** Thermoelectric properties of **PBDTDTBTF-3** films at different doping concentrations.

**Table S1.** Carrier concentration and hall mobility of all three doped polymer films.

| Polymer                                                          | PBDTDTBTF-1           | PBDTDTBTF-2           | PBDTDTBTF-3           |
|------------------------------------------------------------------|-----------------------|-----------------------|-----------------------|
| Carrier concentration (cm <sup>-3</sup> )                        | 1.81×10 <sup>19</sup> | 6.77×10 <sup>19</sup> | 8.49×10 <sup>19</sup> |
| Hall mobility (cm <sup>2</sup> v <sup>-1</sup> s <sup>-1</sup> ) | 3.47×10 <sup>-4</sup> | 1.06×10 <sup>-3</sup> | 3.41×10 <sup>-3</sup> |
